# Supplementary material for: N-coordinated Ru(ii) catalyzed solvent freeN-alkylation of primary amines with alcohols through borrowing hydrogen strategy
Source: Royal Society of Chemistry journal article supplement (doi:10.1039/d3nj00210a), 2023-01-01
Supplement: d3nj00210a1.pdf [file d3nj00210a1.pdf]

## Supporting Information

### **N-coordinated Ru(II) Catalyzed Solvent Free N-alkylation of Primary Amines with Alcohols through Borrowing Hydrogen Strategy**

Bhavya P. Patel M.S.<sup>1</sup>, Rishi Ranjan M.S.<sup>2</sup>, Nimesh R. Chauhan M.S.<sup>1</sup>, Suman Mukhopadhyay Ph.D.<sup>2</sup>, Angshuman Roy Choudhury Ph.D.<sup>3</sup>, Komal M. Vyas Ph.D.<sup>1\*</sup>

<sup>1</sup> Department of Chemistry, Sardar Patel University, Vallabh Vidyanagar-388120, India

<sup>2</sup> Department of Chemistry, School of Basic Sciences, Indian Institute of Technology Indore, Khandwa Road, Simrol, Indore-453552, India

<sup>3</sup> Department of Chemical Sciences, Indian Institute of Science Education and Research, Mohali, Sector 81, S. A. S. Nagar, Manauli PO, Mohali, Panjab 140306, India

\*Corresponding author: komal\_vyas@spuvvn.edu

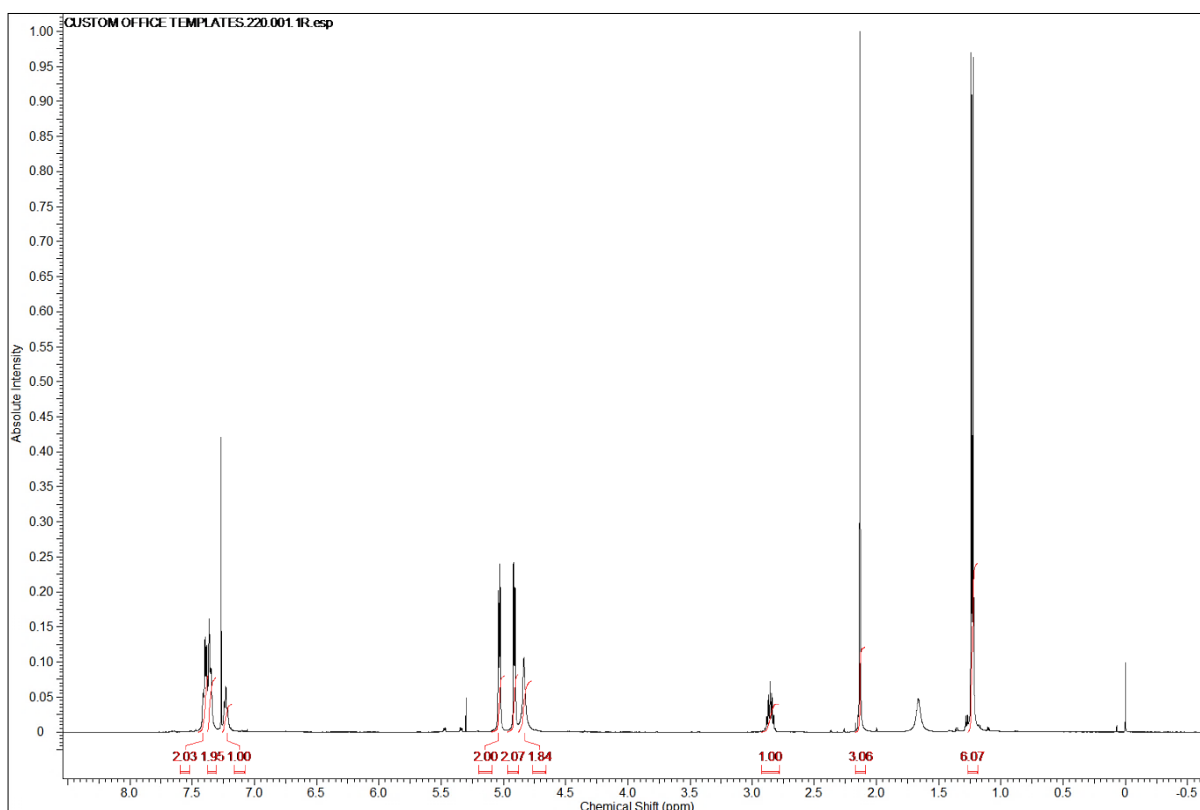

**Fig. S1.** <sup>1</sup>H NMR of [Ru-3].

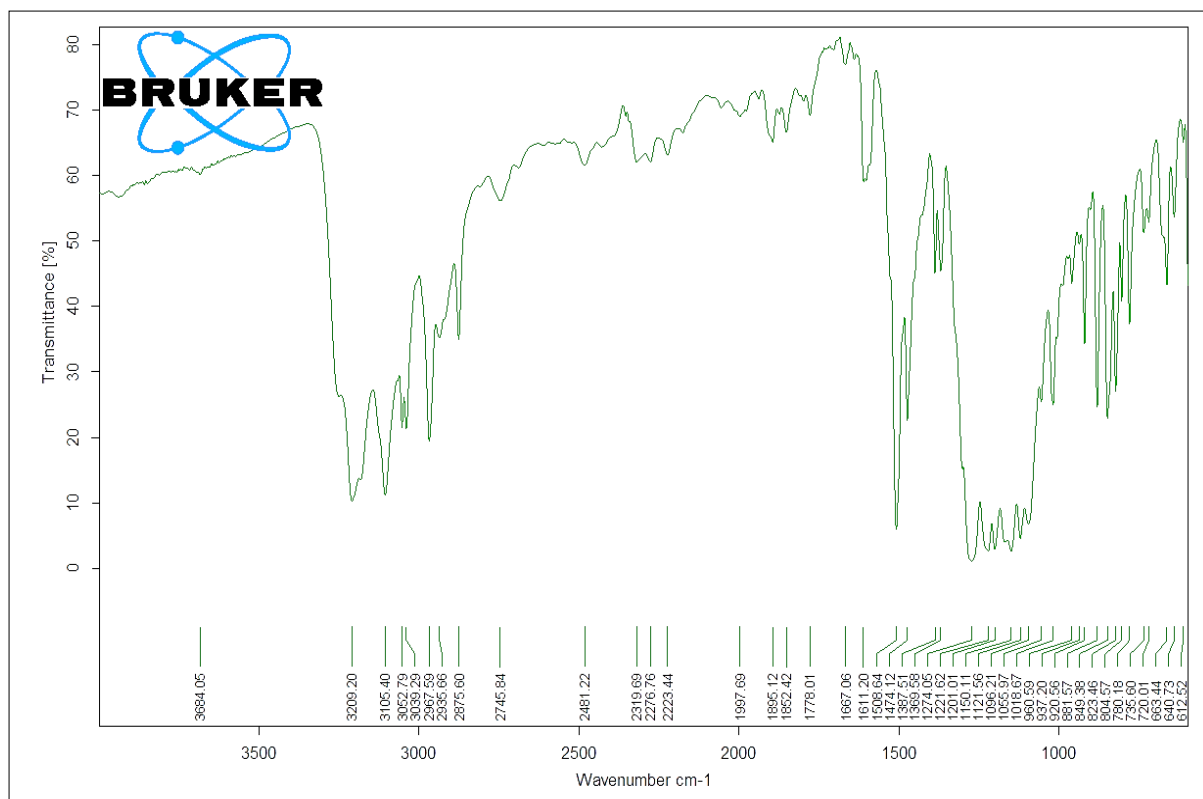

**Fig. S2.** FTIR spectrum of [Ru-1]

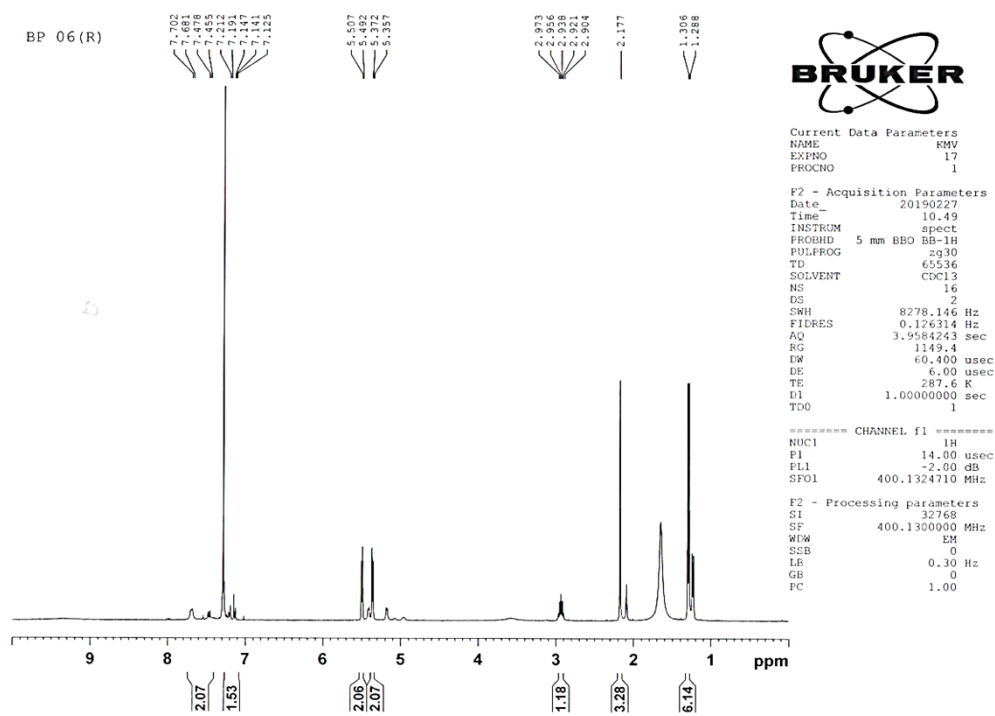

Fig. S3. <sup>1</sup>H NMR spectrum of [Ru-1]

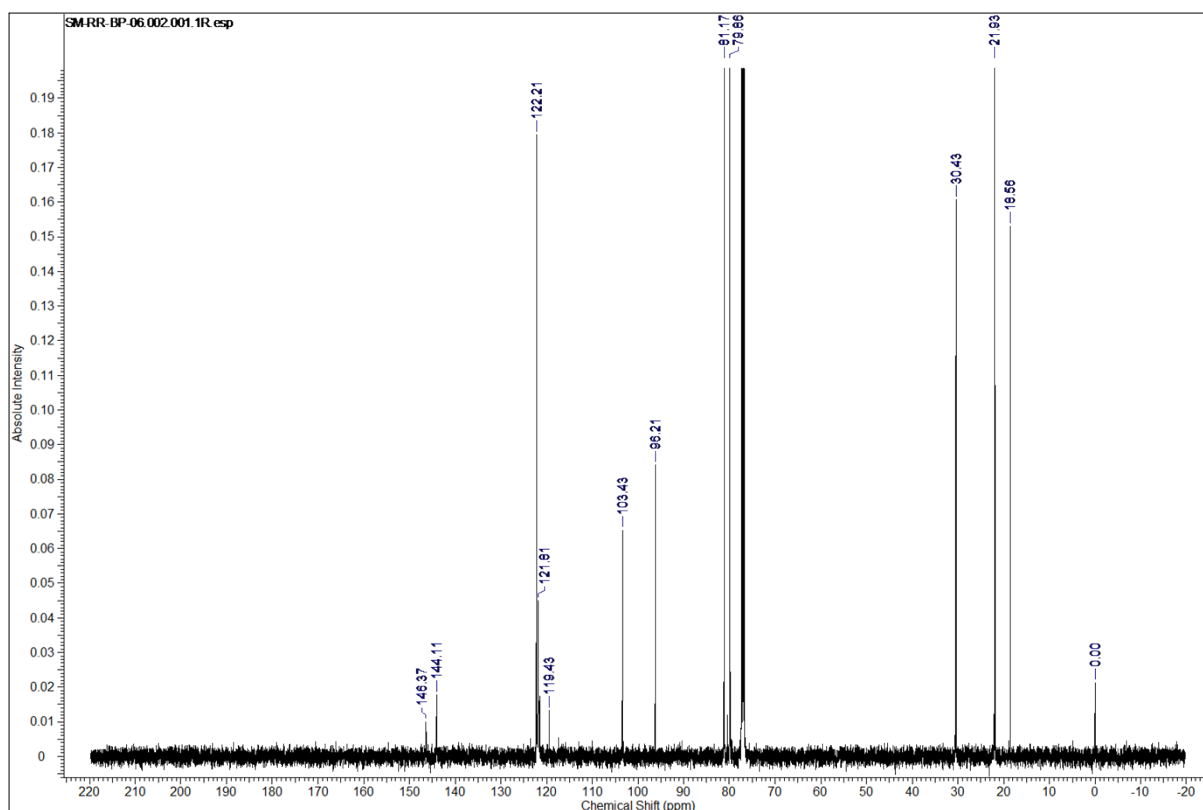

Fig. S4. <sup>13</sup>C NMR spectrum of [Ru-1]

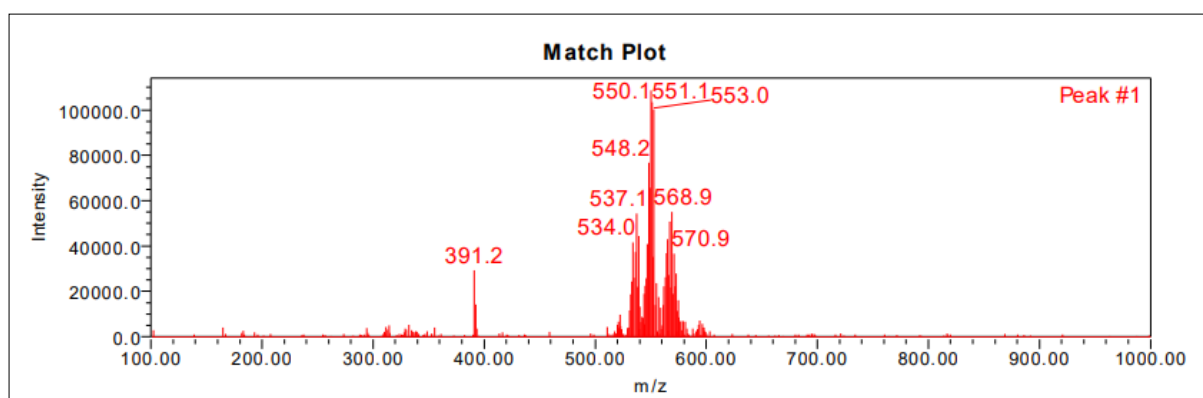

Fig. S5. Mass spectrum of [Ru-1]

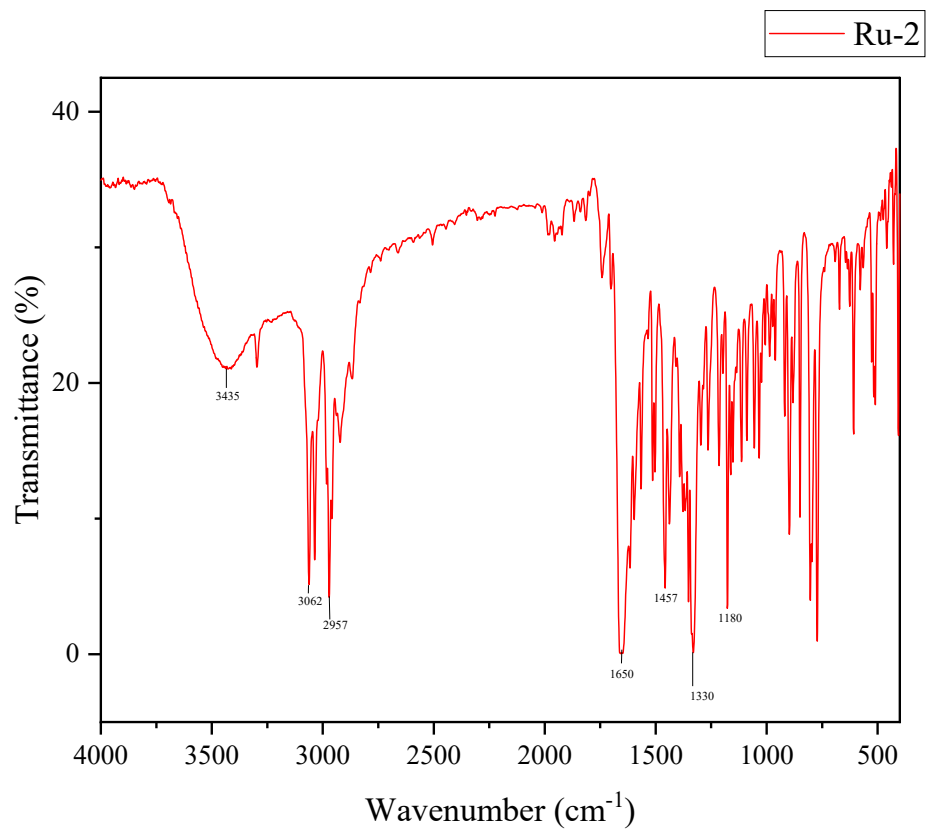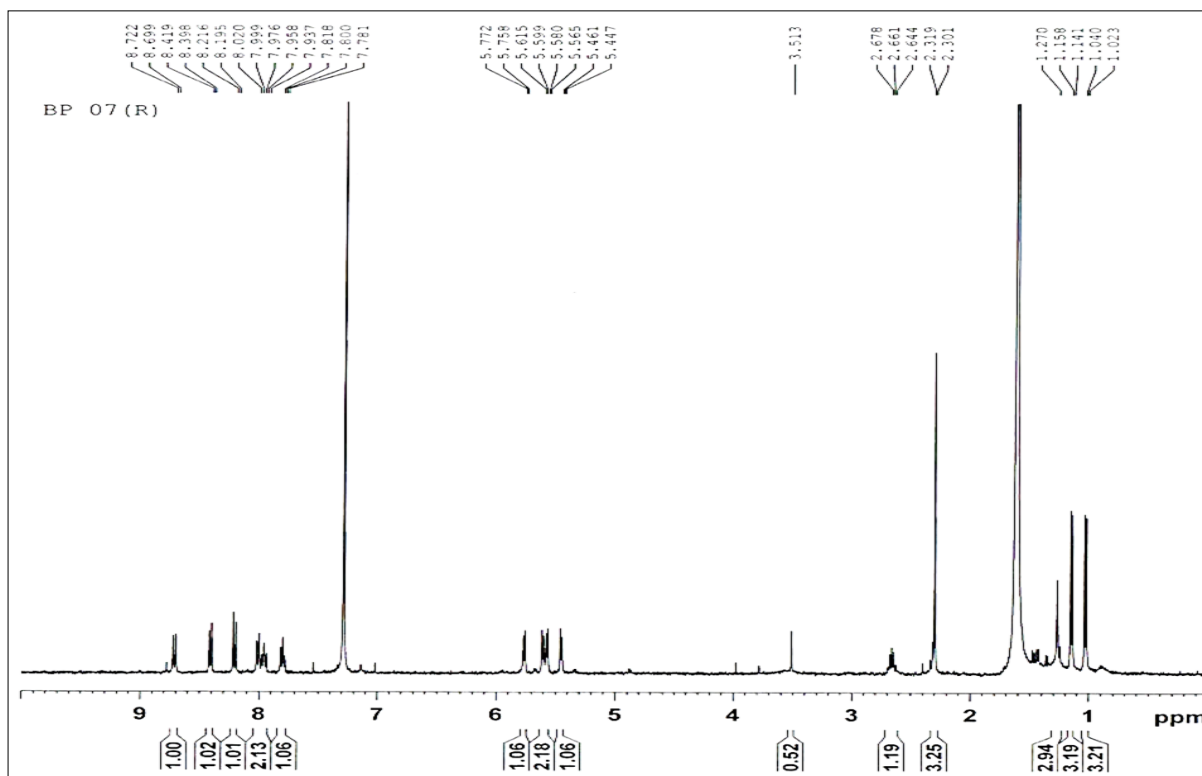

Fig. S6. FTIR spectrum of [Ru-2]

**Fig. S7.**  $^1\text{H}$  NMR spectrum of **[Ru-2]**

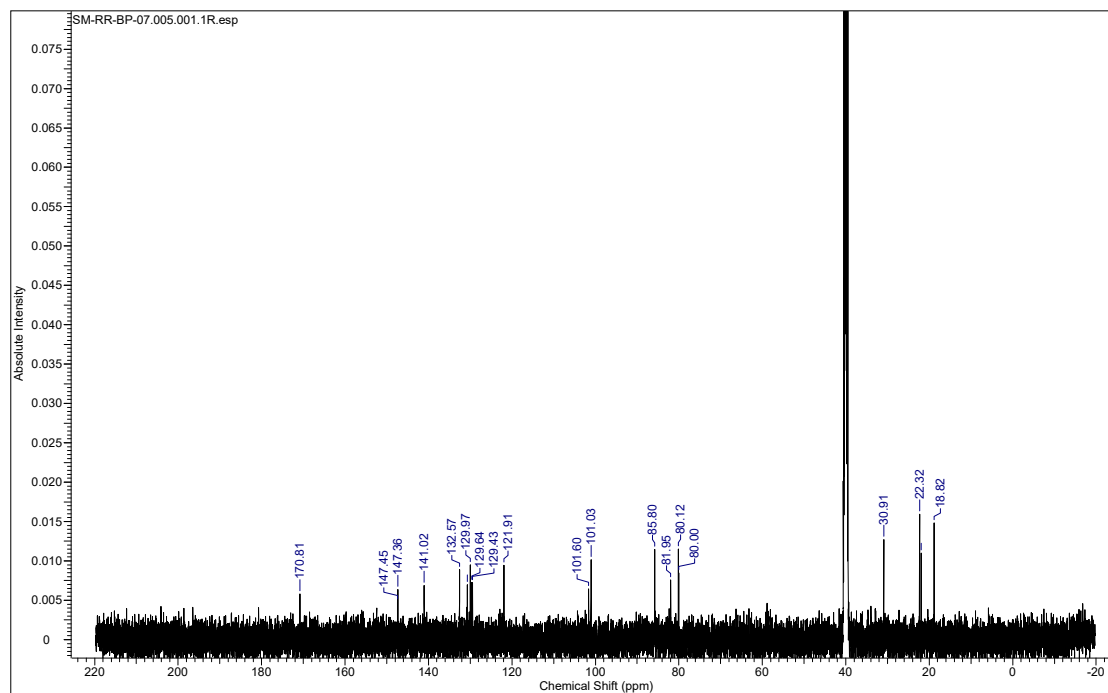

Fig. S8.  $^{13}\text{C}$  NMR spectrum of [Ru-2]

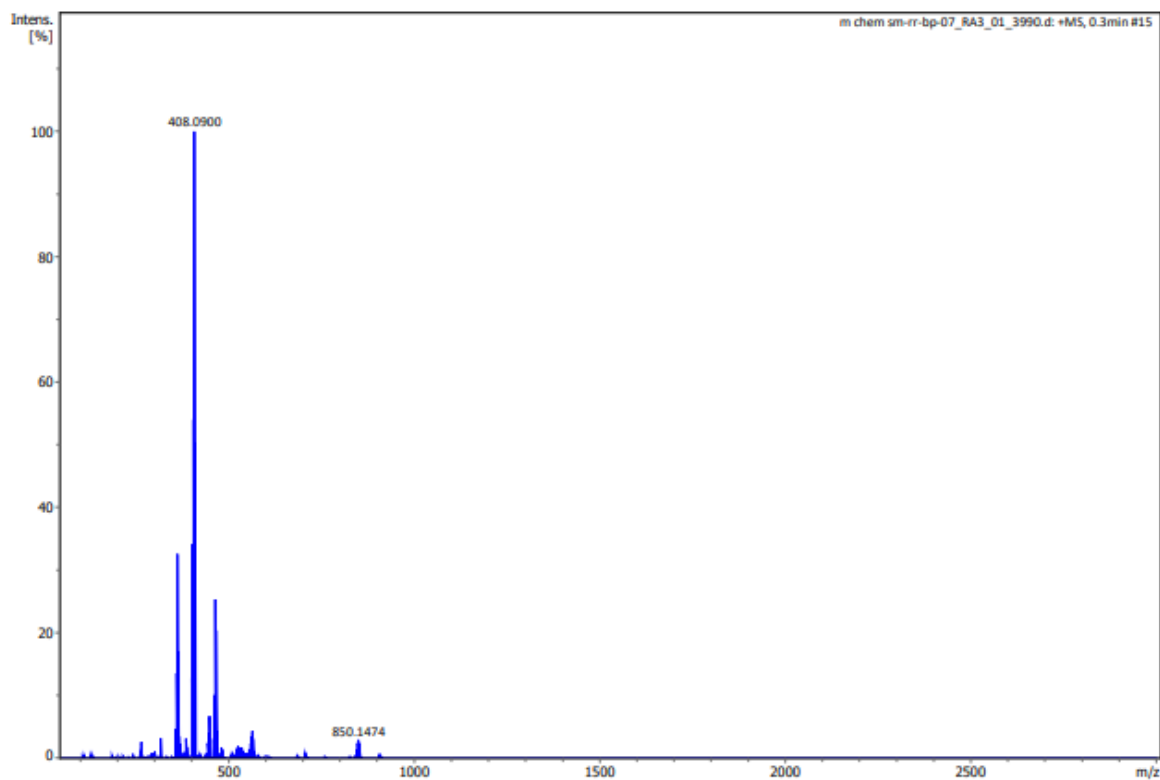

Fig. S9. Mass spectrum of [Ru-2]

**Table S1.** Bond lengths (in Å) of [Ru-1] and [Ru-2].

| [Ru-1]  |            | [Ru-2]  |            |
|---------|------------|---------|------------|
| Ru1 Cl2 | 2.4278(13) | Ru1 Cl1 | 2.4077(8)  |
| Ru1 Cl1 | 2.4115(13) | Ru1 O1  | 2.0850(19) |
| Ru1 N1  | 2.184(4)   | Ru1 N1  | 2.123(2)   |
| Ru1 C13 | 2.209(5)   | Ru1 C16 | 2.167(3)   |
| Ru1 C9  | 2.219(5)   | Ru1 C15 | 2.187(3)   |
| Ru1 C12 | 2.220(5)   | Ru1 C11 | 2.179(3)   |
| Ru1 C11 | 2.188(5)   | Ru1 C14 | 2.171(3)   |
| Ru1 C8  | 2.155(5)   | Ru1 C13 | 2.193(3)   |
| Ru1 C10 | 2.156(5)   | Ru1 C12 | 2.225(3)   |
| N1 C1   | 1.439(7)   | O1 C10  | 1.283(3)   |
| C1 C6   | 1.392(7)   | N1 C9   | 1.327(3)   |
| C1 C2   | 1.373(8)   | N1 C1   | 1.376(3)   |
| C13 C12 | 1.443(8)   | O2 C10  | 1.230(3)   |
| C13 C8  | 1.420(8)   | C16 C15 | 1.402(4)   |
| C9 C8   | 1.476(9)   | C16 C11 | 1.420(4)   |
| C9 C10  | 1.416(8)   | C9 C10  | 1.509(4)   |
| C9 C15  | 1.465(9)   | C9 C8   | 1.403(4)   |
| C6 C5   | 1.377(9)   | C15 C14 | 1.436(4)   |
| C12 C11 | 1.414(8)   | C15 C18 | 1.512(4)   |
| C12 C14 | 1.485(8)   | C1 C6   | 1.425(3)   |
| C11 C10 | 1.435(9)   | C1 C2   | 1.414(4)   |
| O1 C4   | 1.420(9)   | C11 C12 | 1.414(4)   |
| O1 C7B  | 1.214(15)  | C14 C13 | 1.399(4)   |
| O1 C7A  | 1.214(15)  | C6 C7   | 1.412(4)   |
| C2 C3   | 1.400(9)   | C6 C5   | 1.413(4)   |
| F3A C7A | 1.43(2)    | C2 C3   | 1.366(4)   |
| C5 C4   | 1.377(11)  | C8 C7   | 1.359(4)   |
| C4 C3   | 1.374(11)  | C13 C12 | 1.419(5)   |
| C15 C16 | 1.530(11)  | C12 C17 | 1.511(5)   |
| C15 C17 | 1.539(13)  | C18 C20 | 1.518(5)   |
| F2B C7B | 1.43(2)    | C18 C19 | 1.532(5)   |
| F1A C7A | 1.499(19)  | C5 C4   | 1.354(4)   |
| C7B F1B | 1.33(2)    | C3 C4   | 1.403(5)   |
| C7B F3B | 1.32(2)    |         |            |
| C7A F2A | 1.268(16)  |         |            |

**Table S2.** Bond angles (in °) of [Ru-1] and [Ru-2].

| Ru-1        |            | Ru-2       |            |
|-------------|------------|------------|------------|
| Cl1 Ru1 Cl2 | 87.23(5)   | O1 Ru1 Cl1 | 88.28(6)   |
| N1 Ru1 Cl2  | 80.27(11)  | O1 Ru1 N1  | 76.98(8)   |
| N1 Ru1 Cl1  | 83.90(12)  | O1 Ru1 C16 | 114.46(10) |
| N1 Ru1 C13  | 105.78(19) | O1 Ru1 C15 | 88.94(10)  |
| N1 Ru1 C9   | 103.77(18) | O1 Ru1 C11 | 152.44(10) |



|             |            |             |            |
|-------------|------------|-------------|------------|
| N1 Ru1 C12  | 139.54(18) | O1 Ru1 C14  | 92.10(10)  |
| N1 Ru1 C11  | 172.49(19) | O1 Ru1 C13  | 119.84(10) |
| C13 Ru1 C12 | 99.90(15)  | O1 Ru1 C12  | 157.30(10) |
| C13 Ru1 C11 | 168.75(16) | N1 Ru1 C11  | 87.45(6)   |
| C13 Ru1 C9  | 71.1(2)    | N1 Ru1 C16  | 92.83(9)   |
| C13 Ru1 C12 | 38.0(2)    | N1 Ru1 C15  | 114.60(9)  |
| C9 Ru1 C12  | 170.80(17) | N1 Ru1 C11  | 97.93(10)  |
| C9 Ru1 C11  | 101.34(18) | N1 Ru1 C14  | 151.99(10) |
| C9 Ru1 C12  | 83.1(2)    | N1 Ru1 C13  | 163.18(11) |
| C12 Ru1 C12 | 88.52(16)  | N1 Ru1 C12  | 125.72(10) |
| C12 Ru1 C11 | 134.58(14) | C16 Ru1 C11 | 156.73(8)  |
| C11 Ru1 C12 | 105.25(16) | C16 Ru1 C15 | 37.56(11)  |
| C11 Ru1 C11 | 101.28(15) | C16 Ru1 C11 | 38.13(11)  |
| C11 Ru1 C13 | 68.6(2)    | C16 Ru1 C14 | 68.05(11)  |
| C11 Ru1 C9  | 70.0(2)    | C16 Ru1 C13 | 80.68(11)  |
| C11 Ru1 C12 | 37.4(2)    | C16 Ru1 C12 | 68.53(11)  |
| C8 Ru1 C12  | 133.16(16) | C15 Ru1 C11 | 156.49(8)  |
| C8 Ru1 C11  | 138.18(17) | C15 Ru1 C13 | 68.88(12)  |
| C8 Ru1 N1   | 91.98(19)  | C15 Ru1 C12 | 81.32(11)  |
| C8 Ru1 C13  | 37.9(2)    | C11 Ru1 C11 | 118.81(8)  |
| C8 Ru1 C9   | 39.4(2)    | C11 Ru1 C15 | 68.31(11)  |
| C8 Ru1 C12  | 68.0(2)    | C11 Ru1 C13 | 67.44(11)  |
| C8 Ru1 C11  | 80.5(2)    | C11 Ru1 C12 | 37.43(11)  |
| C8 Ru1 C10  | 67.8(20)   | C14 Ru1 C11 | 118.32(8)  |
| C10 Ru1 C12 | 140.95(18) | C14 Ru1 C15 | 38.48(10)  |
| C10 Ru1 C11 | 87.59(17)  | C14 Ru1 C11 | 79.82(11)  |
| C10 Ru1 N1  | 137.4(2)   | C14 Ru1 C13 | 37.39(12)  |
| C10 Ru1 C13 | 81.4(2)    | C14 Ru1 C12 | 67.61(12)  |
| C10 Ru1 C9  | 37.7(2)    | C13 Ru1 C11 | 92.47(9)   |
| C10 Ru1 C12 | 68.4(2)    | C13 Ru1 C12 | 37.46(12)  |
| C10 Ru1 C11 | 38.6(2)    | C12 Ru1 C11 | 92.53(8)   |
| C1 N1 Ru1   | 120.0(3)   | C10 O1 Ru1  | 116.03(17) |
| C6 C1 N1    | 118.6(5)   | C9 N1 Ru1   | 112.76(17) |
| C2 C1 N1    | 121.2(5)   | C9 N1 C1    | 119.1(2)   |
| C2 C1 C6    | 120.1(5)   | C1 N1 Ru1   | 127.53(16) |
| C12 C13 Ru1 | 71.4(3)    | C15 C16 Ru1 | 72.00(17)  |
| C8 C13 Ru1  | 69.0(3)    | C15 C16 C11 | 120.7(3)   |
| C8 C13 C12  | 117.4(5)   | C11 C16 Ru1 | 71.39(16)  |
| C8 C9 Ru1   | 68.0(3)    | N1 C9 C10   | 115.3(2)   |
| C10 C9 Ru1  | 68.7(3)    | N1 C9 C8    | 122.8(3)   |
| C10 C9 C8   | 112.4(5)   | C8 C9 C10   | 121.9(2)   |
| C10 C9 C15  | 127.0(6)   | C16 C15 Ru1 | 70.44(17)  |
| C15 C9 Ru1  | 133.4(4)   | C16 C15 C14 | 117.6(3)   |
| C15 C9 C8   | 120.5(6)   | C16 C15 C18 | 123.7(3)   |
| C5 C6 C1    | 120.5(6)   | C14 C15 Ru1 | 70.13(16)  |
| C13 C12 Ru1 | 70.6(3)    | C14 C15 C18 | 118.7(3)   |
| C13 C12 C14 | 119.3(5)   | C18 C15 Ru1 | 129.0(2)   |
| C11 C12 Ru1 | 70.1(3)    | N1 C1 C6    | 120.2(2)   |

|             |          |             |           |
|-------------|----------|-------------|-----------|
| C11 C12 C13 | 120.2(5) | N1 C1 C2    | 120.7(2)  |
| C11 C12 C14 | 120.6(5) | C2 C1 C6    | 119.0(2)  |
| C14 C12 Ru1 | 131.0(4) | C16 C11 Ru1 | 70.48(16) |
| C12 C11 Ru1 | 72.5(3)  | C12 C11 Ru1 | 73.03(17) |
| C12 C11 C10 | 119.5(5) | C12 C11 C16 | 121.6(3)  |
| C10 C11 Ru1 | 69.5(3)  | C15 C14 Ru1 | 71.38(16) |
| C7B O1 C4   | 118.1(9) | C13 C14 Ru1 | 72.17(16) |
| C7A O1 C4   | 118.1(9) | C14 C13 Ru1 | 70.44(16) |
| C13 C8 Ru1  | 73.1(3)  | O1 C10 C9   | 115.0(2)  |
| C13 C8 C9   | 125.6(5) | O2 C10 O1   | 125.4(3)  |
| C9 C8 Ru1   | 72.6(3)  | O2 C10 C9   | 119.6(3)  |
| C9 C10 Ru1  | 73.5(3)  | C7 C8 C9    | 119.6(3)  |
| C9 C10 C11  | 124.9(5) | C14 C13 C12 | 120.5(3)  |
|             |          | C12 C13 Ru1 | 72.48(16) |
|             |          | C11 C12 Ru1 | 69.54(16) |
|             |          | C13 C12 Ru1 | 70.05(16) |
|             |          | C13 C12 C17 | 120.5(3)  |
|             |          | C17 C12 Ru1 | 129.6(2)  |

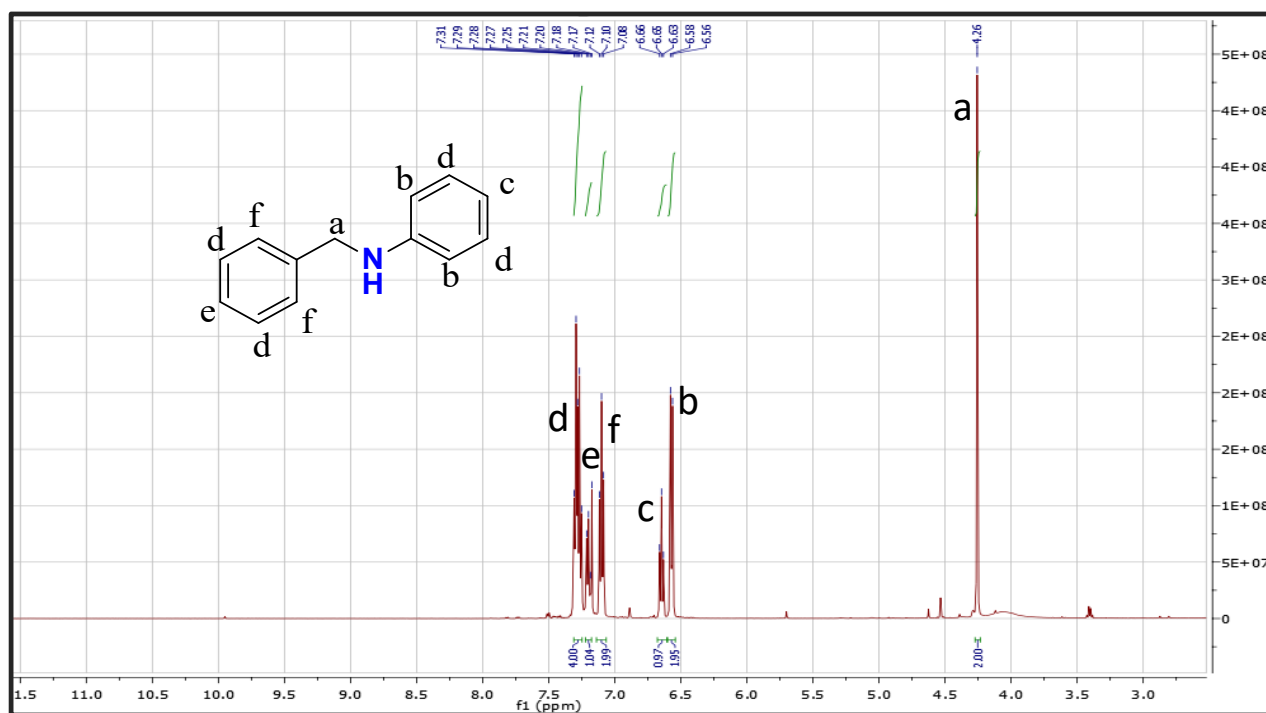

Fig. S10. <sup>1</sup>H NMR of N-benzyl aniline

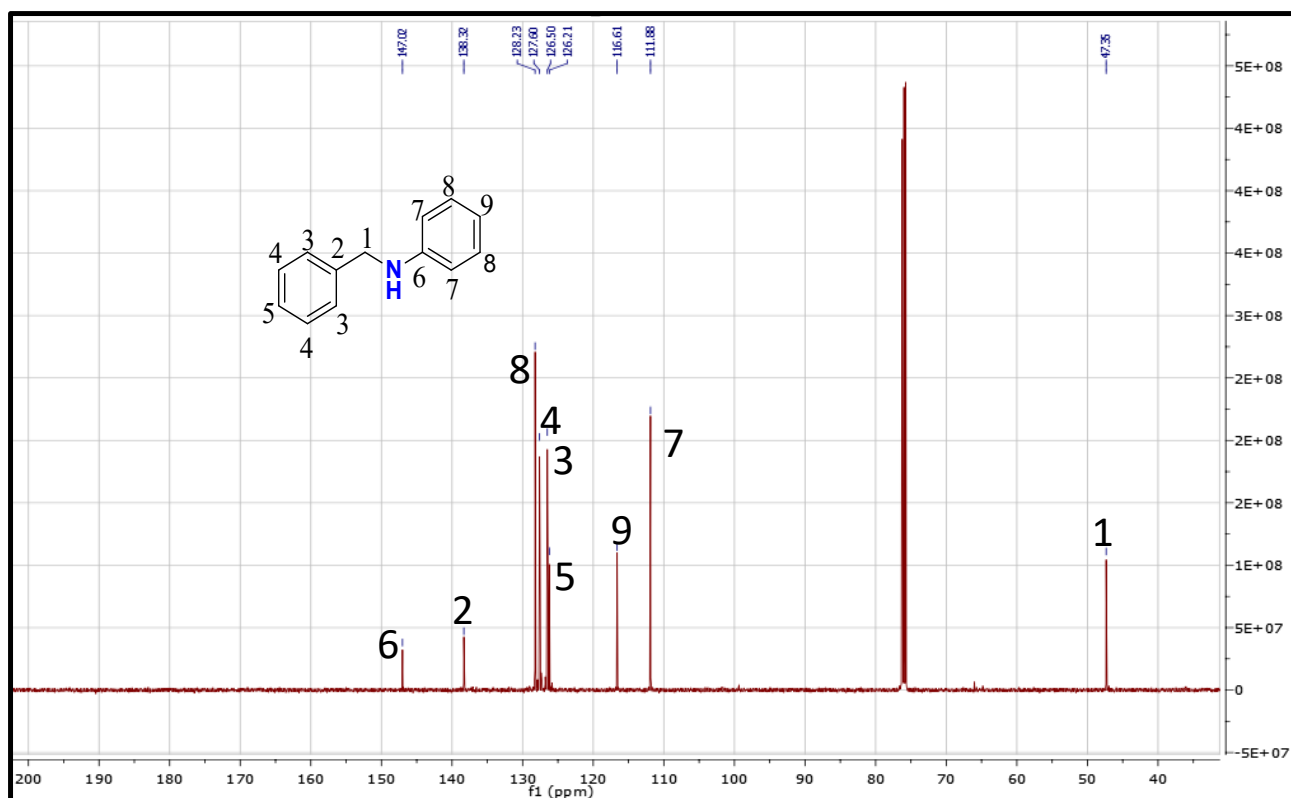

**Fig. S11.**  $^{13}\text{C}$  NMR of N-benzylaniline

### Detailed HPLC procedure

The Dionex HPLC-Ultimate 3000 pump was utilized to analyze products by injecting a 20  $\mu\text{L}$  sample into a Diomex Acclaim® 120 C18 column (250 mm  $\times$  4.6 mm  $\times$  5  $\mu\text{m}$ ), flow rate was set at 1 mL  $\text{min}^{-1}$ . The analysis involved a linear gradient of 40% (v/v) acetonitrile in water for 35 min, which gradually increased to 100% (v/v) acetonitrile in water at 35 min, and was kept constant until 40 min. Thereafter the gradient decreased to 40% (v/v) acetonitrile in water at 42 min. Prior to injection, the samples were prepared by mixing 100  $\mu\text{L}$  of crude reaction mixture in a 900  $\mu\text{L}$  solution of acetonitrile-water (1:1) containing 0.1 % trifluoroacetic acid. The samples were then filtered through a 0.45  $\mu\text{m}$  syringe filter with a diameter of 13 mm and 2.7 pore size. The products were identified using Ultimate 3000 RS VWD, which operated at both 254 nm and 280 nm wavelengths.

### HPLC yield calculation.

Conversion of benzyl alcohols, selectivity, and yield of aldehyde was calculated from the following formulas.

$$\% \text{ conversion} = (C_0 - C_R / C_0) \times 100\% \quad (1)$$

$$\% \text{ yield} = C_p/C_0 \times 100\% \quad (2)$$

$$\% \text{ selectivity} = C_p/(C_0 - C_p) \times 100\% \quad (3)$$

Where,

$C_0$  = Initial concentration of substrate

$C_R$  = Final concentration of substrate

$C_p$  = Final concentration of product

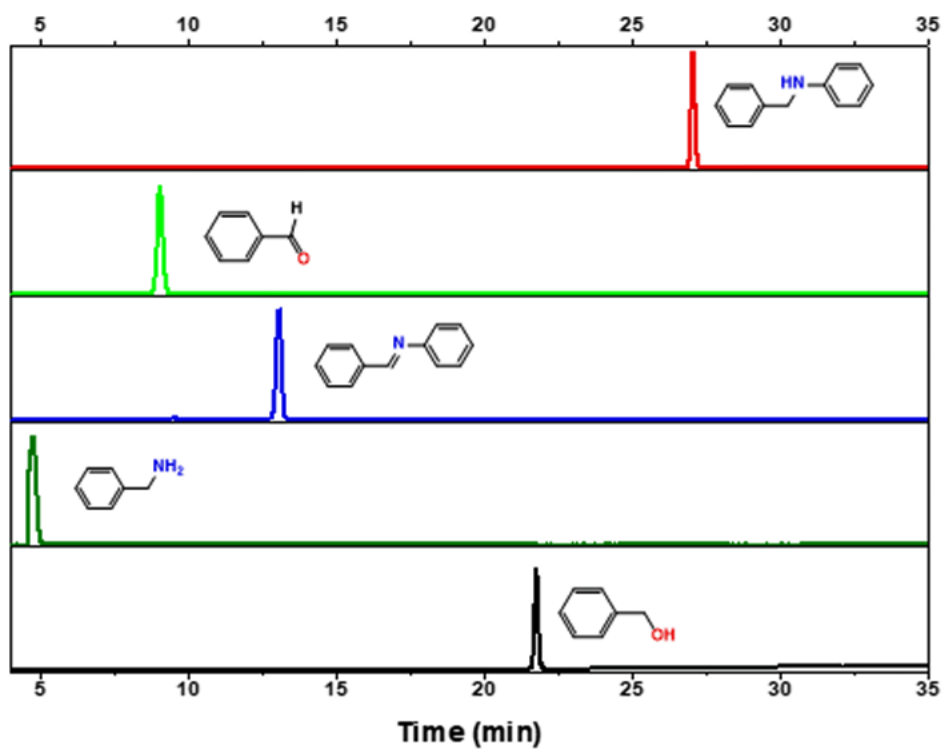

**Fig. S12.** HPLC chromatograms for N-alkylation of aniline with benzyl alcohol via borrowing hydrogen methodology

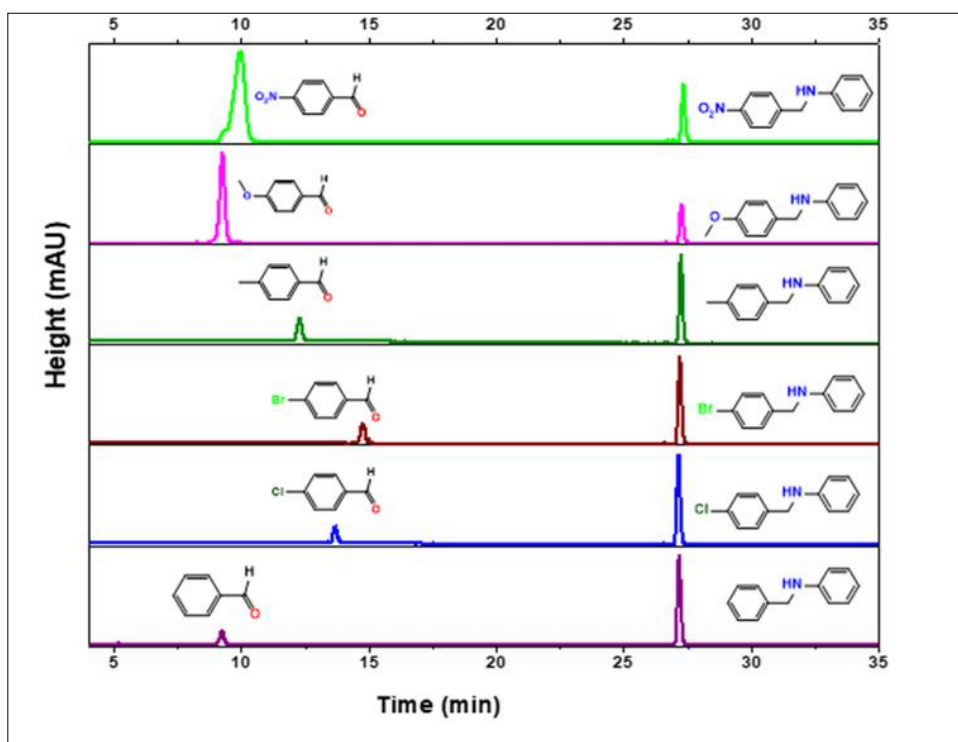

**Fig. S13.** HPLC Chromatograms of substrate scope for N-alkylation of aniline with substituted benzyl alcohols.

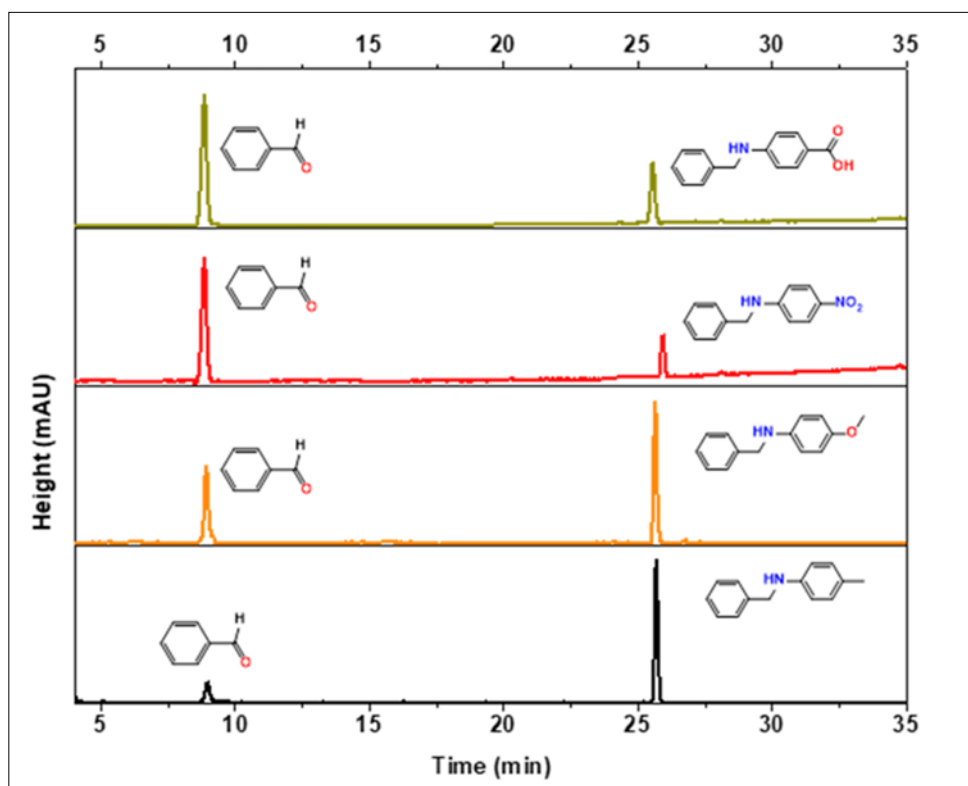

**Fig. S14.** HPLC Chromatograms of substrate scope for N-alkylation of anilines with benzyl alcohol.

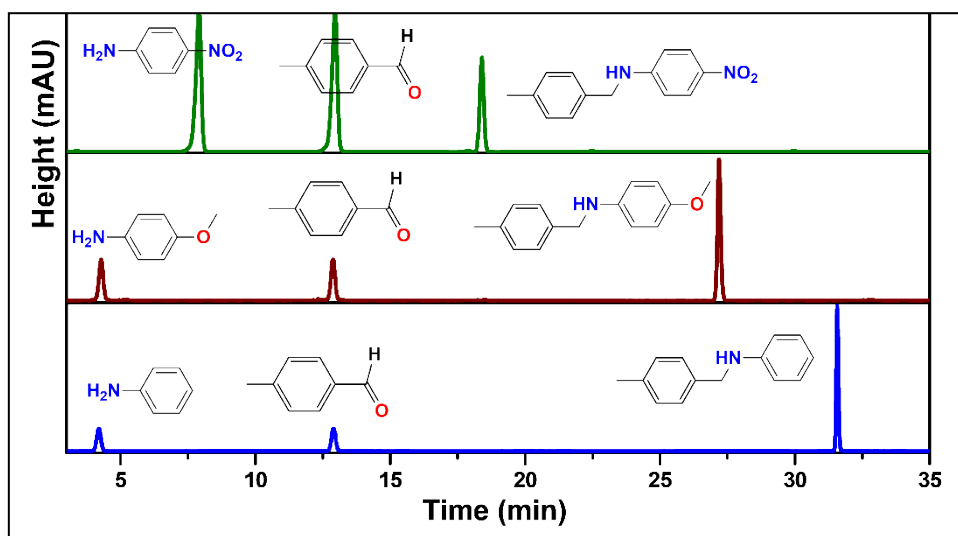

**Fig. S15.** HPLC Chromatograms of N-alkylation of anilines with *p*-CH<sub>3</sub> benzyl alcohol.

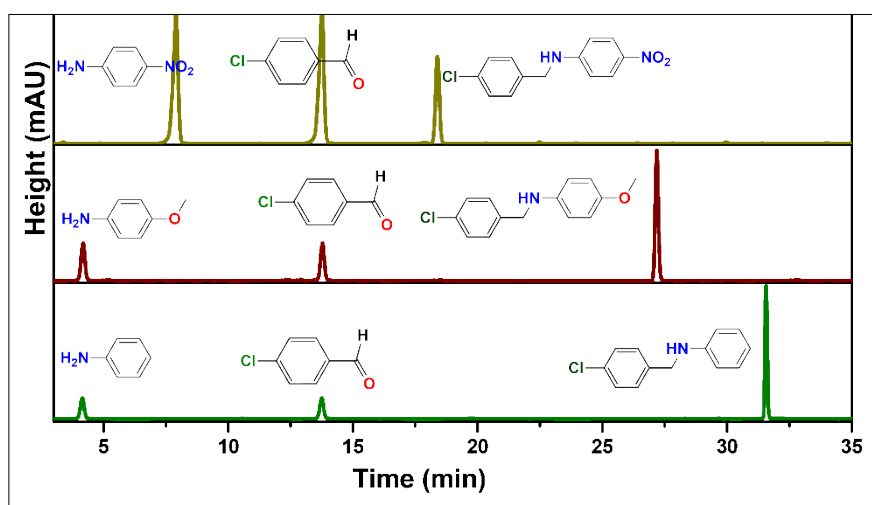

**Fig. S16.** HPLC Chromatograms of N-alkylation of anilines with *p*-Cl benzyl alcohol.

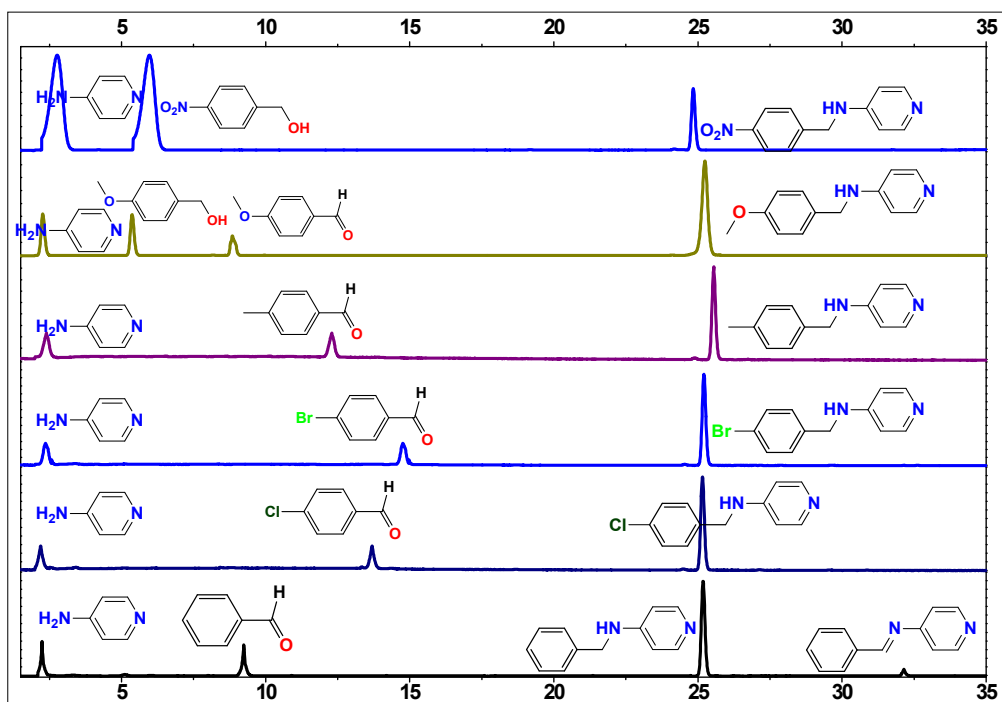

Fig. S17. HPLC Chromatograms of N-alkylation 4-aminopyridine with various benzyl alcohol.

| Peak Report TIC |        |         |        |         |         |                                                |
|-----------------|--------|---------|--------|---------|---------|------------------------------------------------|
| Peak#           | R.Time | Area    | Area%  | Height  | Height% | A/H Name                                       |
| 1               | 14.614 | 2568693 | 24.87  | 612570  | 25.50   | 4.19 Benzenamine, N-(phenylmethylene)-         |
| 2               | 14.886 | 2302317 | 22.29  | 693810  | 28.88   | 3.32 Benzenemethanamine, N-phenyl-             |
| 3               | 14.950 | 1247037 | 12.07  | 526348  | 21.91   | 2.37 Benzenemethanamine, N-phenyl-             |
| 4               | 15.057 | 4212249 | 40.78  | 569576  | 23.71   | 7.40 Benzenemethanamine, N-phenyl-             |
|                 |        | 0330296 | 100.00 | 2402304 | 100.00  |                                                |
| Peak Report TIC |        |         |        |         |         |                                                |
| Peak#           | R.Time | Area    | Area%  | Height  | Height% | A/H Name                                       |
| 1               | 14.621 | 408419  | 100.00 | 112914  | 100.00  | 3.62 Benzenamine, N-[(4-chlorophenyl)methyl]-  |
|                 |        | 408419  | 100.00 | 112914  | 100.00  |                                                |
| Peak Report TIC |        |         |        |         |         |                                                |
| Peak#           | R.Time | Area    | Area%  | Height  | Height% | A/H Name                                       |
| 1               | 16.209 | 1022833 | 100.00 | 370934  | 100.00  | 2.76 Benzenamine, N-[(4-bromophenyl)methyl]-   |
|                 |        | 1022833 | 100.00 | 370934  | 100.00  |                                                |
| Peak Report TIC |        |         |        |         |         |                                                |
| Peak#           | R.Time | Area    | Area%  | Height  | Height% | A/H Name                                       |
| 1               | 12.300 | 3421917 | 54.44  | 718886  | 56.24   | 4.76 Benzaldehyde, 4-nitro-                    |
| 2               | 17.238 | 2863906 | 45.56  | 559358  | 43.76   | 5.12 Benzenamine, N-[(4-nitrophenyl)methyl]-   |
|                 |        | 6285823 | 100.00 | 1278244 | 100.00  |                                                |
| Peak Report TIC |        |         |        |         |         |                                                |
| Peak#           | R.Time | Area    | Area%  | Height  | Height% | A/H Name                                       |
| 1               | 11.584 | 3823812 | 62.13  | 688456  | 57.24   | 5.55 Benzaldehyde, 4-methoxy-                  |
| 2               | 16.356 | 2330575 | 37.87  | 514292  | 42.76   | 4.53 Benzenamine, N-[(4-methoxyphenyl)methyl]- |
|                 |        | 6154387 | 100.00 | 1202748 | 100.00  |                                                |
| Peak Report TIC |        |         |        |         |         |                                                |
| Peak#           | R.Time | Area    | Area%  | Height  | Height% | A/H Name                                       |
| 1               | 10.484 | 1314983 | 51.85  | 526409  | 58.39   | 2.50 Benzenemethanol, 4-methyl-                |
| 2               | 15.548 | 1221023 | 48.15  | 375138  | 41.61   | 3.25 Benzenamine, N-[(4-methylphenyl)methyl]-  |
|                 |        | 2536006 | 100.00 | 901547  | 100.00  |                                                |

Fig. S18. GC-MS data of N-alkylation of anilines with benzyl alcohol
